# Supplementary material for: Loss of circadian protection against influenza infection in adult mice exposed to hyperoxia as neonates
Source: eLife. 2021 Mar 2;10:e61241. doi: 10.7554/eLife.61241 (PMC7924938; doi:10.7554/eLife.61241)
Supplement: Figure 1—source data 1. [file elife-61241-fig1-data1.xlsx]

## Sheet: Sheet1
Figure 1
B							Figure 1D
Day of Death	Room Air ZT23	Room Air ZT11	Hyperoxia ZT23	Hyperoxia ZT11			Day of Death	ZT23_O2	ZT11_O2
0	18	18	16	17			0	16	8
4				17			7	16	8
5		18	16				8	15	7
6			14	16			9	14	6
7		17	13	12			10		4
8	18	11	11	10			14	13	3
9	16	8	8	7
10	14	7	7
14	13	6	6	4
Figure 1 E
Days Post-Infection	ZT23			ZT11
	Mean	SD		Mean	SD
3	2.90267	1.77983		-1.7465	1.73512
4	1.66083	1.50518		-1.95875	1.57815
5	-0.126833	2.57315		-4.01275	2.02844
6	-5.13583	5.41815		-8.0245	2.69794
7	-9.89533	7.24739		-15.2543	3.47825
8	-6.1955	9.76766		-18.7067	2.40373
9	-4.9305	9.69197		-19.326	3.22651
10	-1.79917	6.77331		-18.0605	8.50426
11	0.628	3.32257		-10.8283	9.66204
12	1.27433	4.02544		-5.45133	8.36436
13	1.03233	5.70203		-2.77733	4.3948
14	-0.2245	5.27172		-2.739	2.05285
17	-1.137	6.34704		-6.57833	1.35596
