# Supplementary material for: Loss of circadian protection against influenza infection in adult mice exposed to hyperoxia as neonates
Source: eLife. 2021 Mar 2;10:e61241. doi: 10.7554/eLife.61241 (PMC7924938; doi:10.7554/eLife.61241)
Supplement: Figure 2—source data 1. [file elife-61241-fig2-data1.xlsx]

## Sheet: Sheet1
Figure 2
2A
Period				Amplitude
Room Air	Hyperoxia			Room Air	Hyperoxia
23.9	23.8			2735.7	3057
23.9	24			4300	3812
23.8	24.1			2925	3415
23.9	24			3135	3521
23.9	23.75			4528.88	3755.79
23.85	23.93			4001.71	4705.72
23.9	23.93			2995.49	4043.28
23.98	23.88			2972.99	4332.66
23.92	24			4765.23	3448.34
24	23.83			5038.73	2994.79
23.82	23.93			3857.55	3321.96
23.73	23.87			5574.67	5259.56
	23.73				4001.78
	23.93				2982.86
	24				4830.19
Activity counts
Room Air	Hyperoxia
4.52888	3.75579
4.00171	4.70572
2.99549	4.04328
2.97299	4.33266
4.76523	3.44834
5.03873	2.99479
3.85755	3.32196
5.57467	5.25956
	4.00178
	2.98286
	4.83019
