# Supplementary material for: Loss of circadian protection against influenza infection in adult mice exposed to hyperoxia as neonates
Source: eLife. 2021 Mar 2;10:e61241. doi: 10.7554/eLife.61241 (PMC7924938; doi:10.7554/eLife.61241)
Supplement: Figure 3—source data 1. [file elife-61241-fig3-data1.xlsx]

## Sheet: Figure 3 (Source data 1)
Figure 3 (Source data 1)
Criteria	Description	Scores
Peri-bronchial infiltrates	Inflammatory cells surrounding airways	0-3
Peri-vascular infiltrates	Inflammatory cells surrounding blood vessels	0-3
Alveolar exudates/inflammation	Pink proteinaceous exudates in alveolar space with embedded inflammatory cells	0-2
Epithelial injury/necrosis	Sloughing of epithelial layer, damaged or eroded airway lining.	0-2
