# Supplementary material for: Loss of circadian protection against influenza infection in adult mice exposed to hyperoxia as neonates
Source: eLife. 2021 Mar 2;10:e61241. doi: 10.7554/eLife.61241 (PMC7924938; doi:10.7554/eLife.61241)
Supplement: Figure 3—source data 2. [file elife-61241-fig3-data2.xlsx]

## Sheet: Sheet1
Figure 3
Figure 3b		viral titers
	ZT23_RA													ZT11_RA													ZT23_O2													ZT11_O2
1	2.1	0	2.5	2.3	2.5									3.1	2.5	2.7	2.1	0	2.1	0							0	3.1	2.5	2.1	2.1									2.1	2.5	2.1	2.5	0
3	2.9	3.1	3.5	3.5	2.9									3.5	3.1	2.9	2.7	3.8									3.7	3.6	2.9	3.9											2.9	2.9	3.1	3.7
5	3.1	3.1	2.7	2.7	3.4	3.1	4.4							3.1		2.4	3.7	3.1	2.4	2.7	4.5								2.7	2.7	2.4	3.4	4.1							2.7	3.4	3.4		2.7		3.7
8	0	0	0	0	0	0								0	0	0	0	0	0	0							0	0	0	0	0	0	0	0.1	0	0	0	0	0	0	0	0	0	0	0	0	0	0	0
Figure 3c			ZT23										ZT11
Histology		Room Air	5.875	6.5	7.125	5.875	5.625	5.875					8.875	7	8.25	9.75	9
		Hyperoxia	9.5	9.25	7.5	8.125	9.5	9	9.8				8.75	7.375	7.125	7.125	8.125	7	7.625	10.25
Figure 3 d
BAL counts (in 10^6 cells/ml)
	Room Air (ZT23)							Room Air (ZT11)							Hyperoxia (ZT23)							Hyperoxia (ZT11)
Day 1	4.65	7.52	7.95	7.42	5.1			6.68	3.32	9.84	15.7	9.1			6.4	1.49	1.08	1.29	1.39			3.99	15.8	5.48	10.8	4.1
Day 5	7.5	15	7.98	10	10			26.7	17	7.43	52.7	39			12.3	11.1	14	3.64	10			28	20	71	48	51	54
[truncated: 3 more columns]
