# Supplementary material for: Loss of circadian protection against influenza infection in adult mice exposed to hyperoxia as neonates
Source: eLife. 2021 Mar 2;10:e61241. doi: 10.7554/eLife.61241 (PMC7924938; doi:10.7554/eLife.61241)
Supplement: Figure 4—source data 1. [file elife-61241-fig4-data1.xlsx]

## Sheet: Sheet1
Figure 4 a
Room air
Clock Genes	RA-ZT23	RA-ZT23	RA-ZT23	RA-ZT23	RA-ZT3	RA-ZT3	RA-ZT3	RA-ZT3	RA-ZT3	RA-ZT7	RA-ZT7	RA-ZT7	RA-ZT11	RA-ZT11	RA-ZT11	RA-ZT11	RA-ZT11	RA-ZT11	RA-ZT15	RA-ZT15	RA-ZT15	RA-ZT15	RA-ZT15	RA-ZT15	RA-ZT19	RA-ZT19	RA-ZT19
Clock	1.30988	1.32265	1.10836	1.89662	3.7126	1.38648	0.479443	0.435405	1.05295	1.30173	0.92815	0.700973	1.5534	1.69517	1.15703	0.612776	0.692761	0.288858	2.12201	1.61265	1.54695	0.519225	1.64882	0.396236	2.38738	2.08411	1.4953
CRY	1.03728	1.00752	0.807096	1.92094	1.60861	0.423317	0.681512	0.0933512	0.354981	1.48845	1.69679	1.18905	1.31113	1.7542	1.10635	0.764618	0.749922	0.313777	2.24671	1.45681	1.05761	0.344556	2.00668	0.275631	4.50589	3.84454	2.505
ARNTL	17.1073	14.3059	13.1915	6.49145	22.6673	13.8474	13.4314	3.20104	8.8369	1.7563	1.44047	0.510697	1.30998	2.92927	0.981146	0.323433	0.231092	0.225085	6.84732	2.11336	4.66391	0.941178	4.62207	5.24354	15.0484	9.30199	8.47105
NR1D1	0.143664	0.269952	0.146683	0.0175398	0.883789	0.775809	1.65035	0.56832	0.651472	1.41301	0.962444	1.06347	2.15065	0.995694	1.90498	0.378345	0.315295	0.255036	0.419509	0.0362915	0.0816035	0.0868563	0.37133	0.0553902	0.0403797	0.0425049	0.0187726
NR1D2	0.0885092	0.0924598	0.0649274	0.028105	0.43226	0.303122	0.610038	0.144283	0.201377	1.13916	0.677349	0.586812	2.07192	1.57896	1.54432	0.289567	0.34174	0.173496	1.21585	0.179614	0.275089	0.186593	0.850846	0.0206885	0.0812195	0.065925	0.036221
Per2	0.124213	0.0811587	0.0850167	0.121573	0.116056	0.0767276	0.140914	0.0371856	0.0594528	0.723412	0.513661	0.550529	1.09801	1.56796	1.83896	0.406095	0.418671	0.670305	1.26391	0.330538	0.905565	0.360955	1.502	0.0357699	0.385523	0.526275	0.226548
Clock genes	O2-ZT23	O2-ZT23	O2-ZT23	O2-ZT23	O2-ZT3	O2-ZT3	O2-ZT3	O2-ZT3	O2-ZT3	O2-ZT3	O2-ZT7	O2-ZT7	O2-ZT7	O2-ZT11	O2-ZT11	O2-ZT11	O2-ZT11	O2-ZT11	O2-ZT15	O2-ZT15	O2-ZT15	O2-ZT15	O2-ZT15	O2-ZT15	O2-ZT19	O2-ZT19	O2-ZT19
Clock	2.25391	0.70879	1.36929	1.05295	0.23544	1.92576	1.5352	1.51933	0.258893	0.272708	1.06543	0.900895	1.25826	1.19535	0.766539	1.98128	0.202983	0.133826	3.43291	1.62386	2.42239	0.578517	1.26175	1.07061	2.38738	2.08411	1.4953
CRY	1.79728	0.292764	0.982693	0.99641	0.227165	0.870437	0.451192	0.355473	0.301204	0.0928993	1.05176	1.26999	1.66303	1.63106	0.9394	0.558184	0.220189	0.172517	3.29393	2.02906	2.28281	0.53917	1.28237	1.13038	4.50589	3.84454	2.505
ARNTL	26.4197	7.42577	6.84258	12.9022	3.2233	18.5525	17.0245	14.5661	1.53532	1.73573	1.69883	1.18883	1.84618	1.52366	0.889792	0.76183	0.309613	0.163861	5.48518	6.66008	27.2756	1.05449	0.86967	14.3954	22.7933	12.6016	15.1426
NR1D1	0.178225	0.651472	0.0762972	0.0574231	0.227002	1.15331	1.21653	1.94905	0.36851	0.315514	1.0124	0.921959	1.48429	1.61303	2.67544	0.566746	0.308379	0.195844	0.588361	0.0476551	0.0560856	0.188126	0.14287	0.0905447	0.0500937	0.0326624	0.0289313
NR1D2	0.105988	0.19587	0.0431639	0.0477277	0.0721414	0.424245	0.404432	0.556314	0.0984797	0.0907455	0.557858	0.541476	1.041	1.31674	1.05773	0.665251	0.169455	0.11118	1.16956	0.293	0.156688	0.367285	0.313594	0.0547108	0.163116	1.14232	0.906243
Per2	0.253646	0.0562848	0.0345514	0.159972	0.0523702	0.129129	0.0833826	0.120817	0.0652847	0.0480903	0.271663	0.381536	0.590861	1.06798	0.840249	0.81219	0.423928	0.282611	1.03375	0.599524	0.575102	0.501002	0.39417	0.215669	0.739125	0.536961	0.570734
