# Supplementary material for: Loss of circadian protection against influenza infection in adult mice exposed to hyperoxia as neonates
Source: eLife. 2021 Mar 2;10:e61241. doi: 10.7554/eLife.61241 (PMC7924938; doi:10.7554/eLife.61241)
Supplement: Figure 4—source data 2. [file elife-61241-fig4-data2.xlsx]

## Sheet: Figure 2 source data 2
Primers for qPCR
	Gene name	Catalog number
	18s	Hs99999901_s1
	Arntl	Mm00500226_m1
	Per2	Mm00478113_m1
	Nr1d1	Mm01301783_g1
	Nr1d2	Mm01310356_g1
	Cry1	Mm00514392_m1
	Clock	Mm00455950_m1
	Ccl2	Mm00441242_m1
	IL10	Mm01288386_m1
	IL1B	Mm00434228_m1
