# Supplementary material for: Loss of circadian protection against influenza infection in adult mice exposed to hyperoxia as neonates
Source: eLife. 2021 Mar 2;10:e61241. doi: 10.7554/eLife.61241 (PMC7924938; doi:10.7554/eLife.61241)
Supplement: Figure 5—source data 1. [file elife-61241-fig5-data1.xlsx]

## Sheet: Sheet1
Figure 5 a
	SPCcre- (CT23)	SPCcre- (CT11)	SPCcre+ (CT23)	SPCcre+ (CT11)
0	21	20	17	18
5		20		18
6		19		17
7	21	17	17	15
8	19	14	13
9		9	9	14
10		5		8
14	15	4	4	7
Figure 5 c
Day Post infection	SPC-cre- (CT23)							SPC-cre- (CT11)							SPC-cre+ (CT23)							SPC-cre+(CT11)
1	3.9	6.9	5.7	6.9	7.4	4.1	0	6.4	6.4	2.7	4.4	4.9	5.1		5.9	5.9	5.7	0	5.1			2.4	6.4	2.7	5.7
5	2.1	1.9	4.7	4.3	4.4	4.1		2.4	4.7	2.9	5.1	3.9	3.7	2.7	4.7	4.9	4.4	4.1	4.1			2.9			4.1	4.7	4.7	4.4
8	1.9	0	0	0	2.4	0.9	4.1	0.9	0.9	0.9	4.9	0	4.4		1.9	3.4	0	0	3.1	3.7	5.1	1.9	1.7	1.9	0	3.7	4.7	0
