# Supplementary material for: Loss of circadian protection against influenza infection in adult mice exposed to hyperoxia as neonates
Source: eLife. 2021 Mar 2;10:e61241. doi: 10.7554/eLife.61241 (PMC7924938; doi:10.7554/eLife.61241)
Supplement: Figure 6—source data 1. [file elife-61241-fig6-data1.xlsx]

## Sheet: Sheet1
Figure 6
IL10	Room Air ZT23	Room Air ZT11	Hyperoxia ZT23	Hyperoxia ZT 11				SPCcre- (CT23)	SPCcre- (CT11)	SPCcre+(CT23)	SPCcre+ (CT11)
Mean	1.13804	0.585723	0.474996	0.422127			Mean	1.28	0.41	0.96	0.78
Std. Deviation	0.217335	0.229204	0.252757	0.19733			Std. Deviation	0.45	0.21	0.12	0.32
IL1b	Room Air ZT23	Room Air ZT11	Hyperoxia ZT23	Hyperoxia ZT 11				SPCcre- (CT23)	SPCcre- (CT11)	SPCcre+(CT23)	SPCcre+ (CT11)
Mean	1	0.165762	0.423693	0.322668			Mean	1.0959	0.421679	0.710788	0.528653
Std. Deviation	0.561885	0.12285	0.288003	0.140356			Std. Deviation	0.500211	0.220718	0.167108	0.25162
6b
BAL count (Day 5)
	CT23						CT11
Cre-	2.59	4.56	4.02	1.36	1.75		4.64	8.15	5.15	5.15	4.65	4.12
Cre+	3.15	4.41	2.98	2.73	2.73		4.63	2.96	2.96	6.02	8.16
								5.15
